# Supplementary material
Source: PubMed Central journal article supplement (PMC1852206)

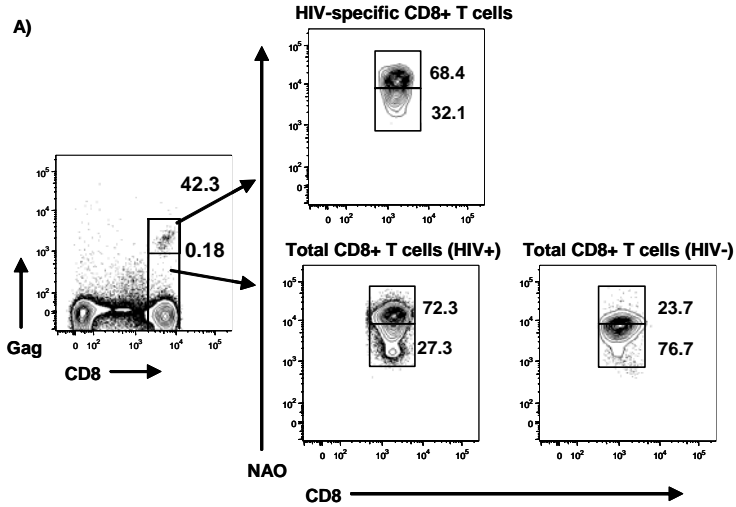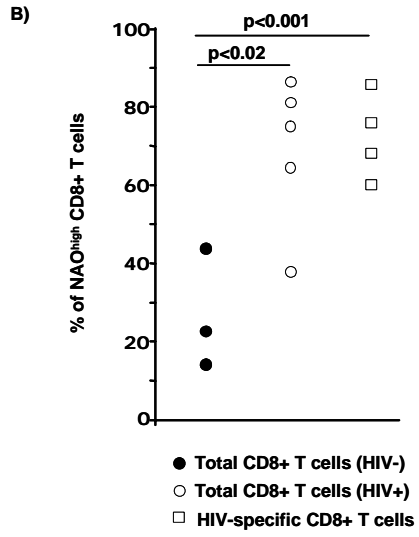

Supplement: blood_blood-2006-05-021626_1.pdf [file blood_blood-2006-05-021626_1.pdf]

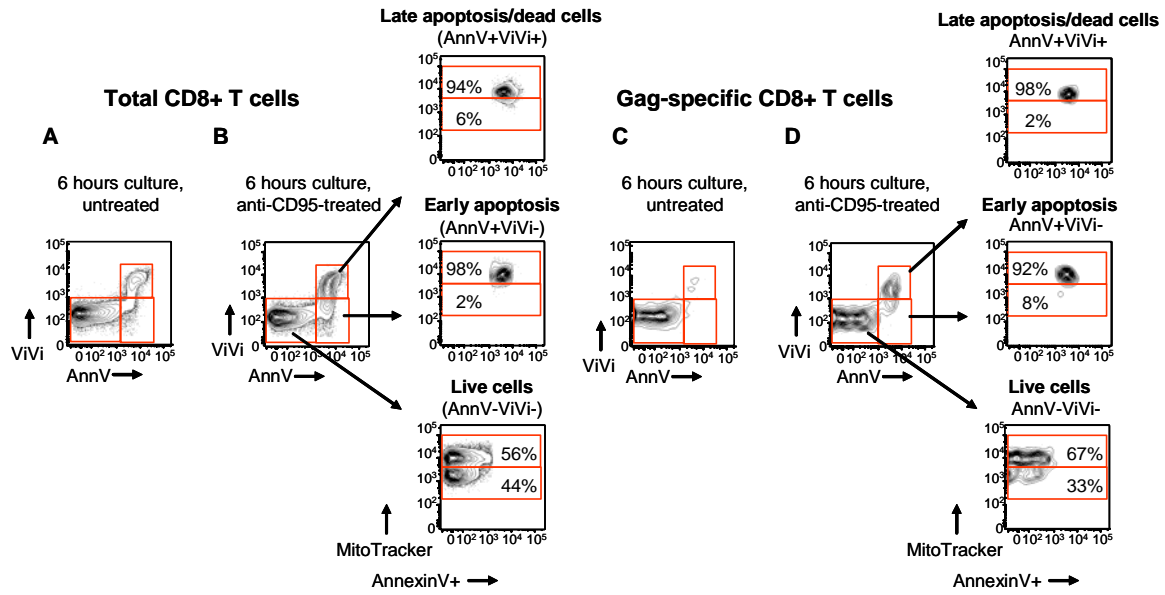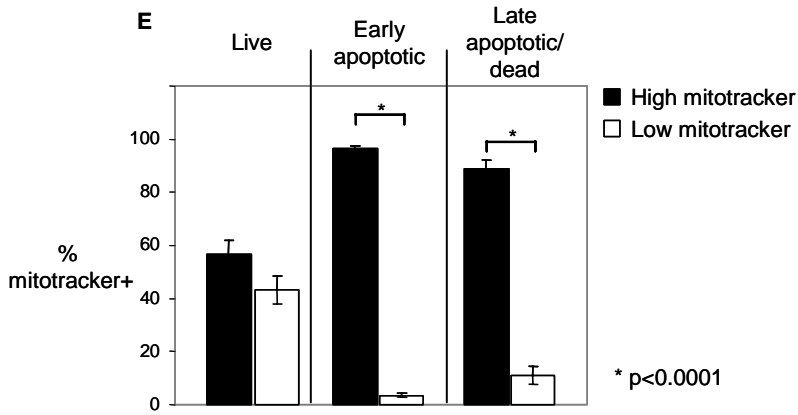

Supplement: blood_blood-2006-05-021626_2.pdf [file blood_blood-2006-05-021626_2.pdf]
